# Supplementary material for: Personalized E-Coaching in Cardiovascular Risk Reduction: A Randomized Controlled Trial
Source: PubMed Central journal article supplement (PMC6634325; doi:10.5334/aogh.2496), 2019-07-12

**Supplementary Figure 1.** Method for calculating the transit time (TT) used to derive carotid-femoral PWV, using the ‘foot-to-foot’ using the Vicorder device.

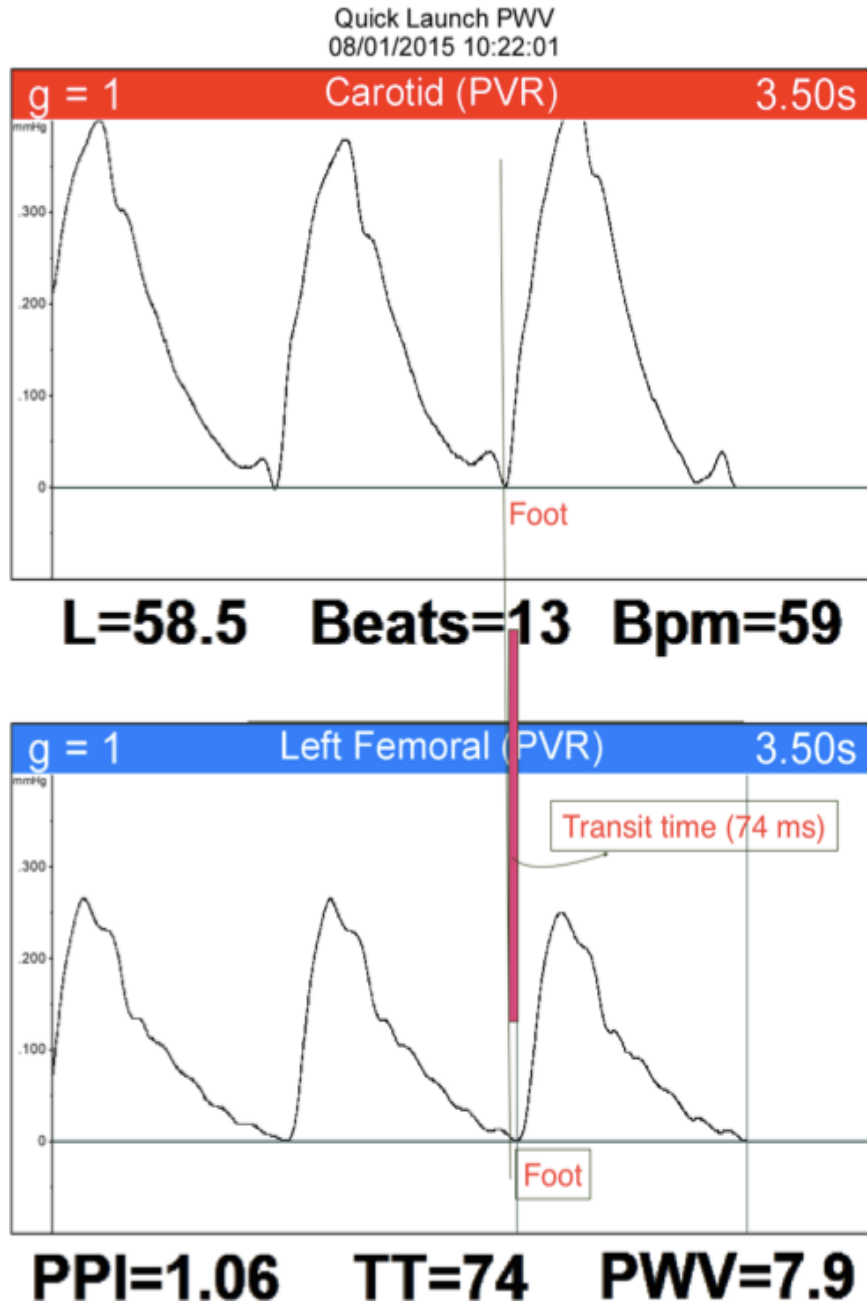

Supplement: agh-85-1-2496-s1.pdf [file agh-85-1-2496-s1.pdf]
