# Supplementary material for: Personalized E-Coaching in Cardiovascular Risk Reduction: A Randomized Controlled Trial
Source: PubMed Central journal article supplement (PMC6634325; doi:10.5334/aogh.2496), 2019-07-12
Supplement: agh-85-1-2496-s2.pdf [file agh-85-1-2496-s2.pdf]

## Changes in parameters at 3-month and 6-month follow-up
